# Supplementary material
Source: PubMed Central journal article supplement (PMC5015432)
Supplement: NIHMS558379-supplement-01.pdf [file NIHMS558379-supplement-01.pdf]

## Supplementary webappendix

This webappendix formed part of the original submission and has been peer reviewed. We post it as supplied by the authors.

Supplement to: Witkowski B, Amaratunga C, Khim N, et al. Novel phenotypic assays for the detection of artemisinin-resistant *Plasmodium falciparum* malaria in Cambodia: in-vitro and ex-vivo drug-response studies. *Lancet Infect Dis* 2013; published online Sept 11. [http://dx.doi.org/10.1016/S1473-3099\(13\)70252-4](http://dx.doi.org/10.1016/S1473-3099(13)70252-4).

## APPENDIX MATERIAL

### Novel phenotypic assays detect artemisinin-resistant *Plasmodium falciparum* malaria in Cambodia: in-vitro and ex-vivo drug response studies

Benoit Witkowski, Chanaki Amaratunga, Nimol Khim, Sokunthea Sreng, Pheaktra Chim, Saorin Kim, Pharath Lim, Sivanna Mao, Chantha Sopha, Bamey Sam, Jennifer M. Anderson, Soheat Duong, Char Meng Chuor, Walter R. J. Taylor, Seila Suon, Odile Mercereau-Puijalon, Rick M. Fairhurst, Didier Menard

#### Contents

Appendix 1: Patient information and corresponding data from in-vitro assays performed on *P. falciparum* isolates from Pursat in 2010.

Appendix 2: Protocols, PCR/nested PCR primer sequences, and LDR probe sequences used to genotype *P. falciparum* isolates obtained in Pursat in 2010.

Appendix 3: Patient information and corresponding data from ex-vivo assays performed on *P. falciparum* isolates from Pursat, Preah Vihear, and Ratanakiri in 2012.

Appendix 4: Grading of asexual *P. falciparum* parasites into two developmental categories: ‘tiny’ (Panel A) and ‘large’ (Panel B) rings.

Appendix 5: Selection of *P. falciparum* isolates from Pursat in 2010 for culture adaptation and use in in-vitro assays.

Appendix 6: Individual stage-dependent patterns in in-vitro survival assays (RSA<sup>0-3h</sup>, RSA<sup>9-12h</sup>, and TSA<sup>18-21h</sup>) performed on parasite isolates from fast- (Panel A) and slow-clearing (Panel B) infections in Pursat in 2010.

**Appendix 1: Patient information and corresponding data from in-vitro assays performed on *P falciparum* isolates from Pursat in 2010.**

| ID          | Age (years) | Sex      | Parasitemia at 0 hours (/mm <sup>3</sup> ) | Parasite clearance half-life (hours) | Fit of parasite clearance curve - R <sup>2</sup> | RSA <sup>0-3h</sup> survival rate (%) | RSA <sup>9-12h</sup> survival rate (%) | TSA <sup>18-21h</sup> survival rate (%) | Artesunate IC <sub>50</sub> (nM) | DHA IC <sub>50</sub> (nM) | % of tiny rings at 0 hours |
|-------------|-------------|----------|--------------------------------------------|--------------------------------------|--------------------------------------------------|---------------------------------------|----------------------------------------|-----------------------------------------|----------------------------------|---------------------------|----------------------------|
| 906         | 23          | M        | 33,742                                     | 2.20                                 | 0.8090                                           | 0.15                                  | 1.01                                   | 0.15                                    | 0.28                             | 0.29                      | 42.4                       |
| 919         | 37          | F        | 250,000                                    | 3.03                                 | 0.8847                                           | 0.01                                  | 0.06                                   | 0.17                                    | 0.77                             | 0.58                      | 82.9                       |
| 970         | 23          | M        | 100,936                                    | 3.59                                 | 0.8685                                           | 0.25                                  | 2.1                                    | 0.12                                    | 0.94                             | 0.88                      | 86.4                       |
| 189-4       | 13          | M        | 272,000                                    | 3.65                                 | 0.9660                                           | 0.23                                  | 0.46                                   | 0.50                                    | 1.69                             | 0.97                      | 76.8                       |
| 915         | 18          | M        | 50,633                                     | 3.69                                 | 0.9357                                           | 0.35                                  | 0.94                                   | 0.37                                    | 1.34                             | 0.68                      | 65.6                       |
| 931         | 29          | M        | 296,666                                    | 4.25                                 | 0.8884                                           | 0.56                                  | 1.07                                   | 0.52                                    | 0.82                             | 0.57                      | 85.4                       |
| 911         | 19          | M        | 51,576                                     | 4.46                                 | 0.8672                                           | 0.19                                  | 0.60                                   | 0.32                                    | 0.98                             | 0.76                      | 81.8                       |
| 918         | 58          | M        | 351,111                                    | 4.54                                 | 0.9377                                           | 0.14                                  | 0.97                                   | 0.14                                    | 1.52                             | 0.90                      | 77.4                       |
| 1003        | 31          | M        | 25,920                                     | 4.56                                 | 0.9839                                           | 0.05                                  | 1.16                                   | 0.04                                    | 1.00                             | 0.60                      | 37.5                       |
| <b>1006</b> | <b>48</b>   | <b>M</b> | <b>11,882</b>                              | <b>4.67</b>                          | <b>0.9680</b>                                    | <b>19.32</b>                          | <b>6.27</b>                            | <b>3.08</b>                             | <b>1.33</b>                      | <b>0.71</b>               | <b>64.8</b>                |
| <b>1007</b> | <b>24</b>   | <b>M</b> | <b>16,466</b>                              | <b>4.71</b>                          | <b>0.9237</b>                                    | <b>5.30</b>                           | <b>1.30</b>                            | <b>4.08</b>                             | <b>1.71</b>                      | <b>1.20</b>               | <b>42.4</b>                |
| <b>1009</b> | <b>42</b>   | <b>M</b> | <b>27,714</b>                              | <b>4.77</b>                          | <b>0.9314</b>                                    | <b>51.39</b>                          | <b>10</b>                              | <b>5.14</b>                             | <b>0.87</b>                      | <b>0.40</b>               | <b>27.0</b>                |
| 945         | 10          | M        | 188,500                                    | 4.83                                 | 0.8714                                           | 0.22                                  | 1.09                                   | 0.20                                    | 1.42                             | 1.01                      | 78.1                       |
| 968         | 64          | M        | 36,730                                     | 7.97                                 | 0.9855                                           | 8.34                                  | 1.71                                   | 4.88                                    | 0.96                             | 0.68                      | 57.5                       |
| 818-2       | 46          | M        | 47,835                                     | 7.97                                 | 0.9877                                           | 13.48                                 | 8.00                                   | 1.69                                    | 1.00                             | 0.81                      | 88.8                       |
| 976         | 44          | M        | 65,432                                     | 8.21                                 | 0.9305                                           | 2.18                                  | 0.78                                   | 2.79                                    | 1.14                             | 0.79                      | 65.0                       |
| 946         | 17          | M        | 53,626                                     | 8.26                                 | 0.9458                                           | 7.35                                  | 1.20                                   | 6.13                                    | 1.95                             | 1.04                      | 94.4                       |
| 969         | 20          | M        | 95,304                                     | 8.32                                 | 0.9599                                           | 6.30                                  | 2.12                                   | 2.98                                    | 2.50                             | 1.51                      | 75.0                       |
| 950         | 15          | F        | 79,714                                     | 8.54                                 | 0.9495                                           | 3.20                                  | 3.48                                   | 0.92                                    | 1.71                             | 1.30                      | 81.8                       |
| 958         | 30          | M        | 41,553                                     | 8.73                                 | 0.9851                                           | 29.14                                 | 3.62                                   | 8.05                                    | 1.11                             | 0.71                      | 43.7                       |
| <b>896</b>  | <b>21</b>   | <b>M</b> | <b>82,807</b>                              | <b>8.75</b>                          | <b>0.9322</b>                                    | <b>0.16</b>                           | <b>0.33</b>                            | <b>0.48</b>                             | <b>0.83</b>                      | <b>0.42</b>               | <b>76.4</b>                |
| 955         | 48          | M        | 20,242                                     | 9.05                                 | 0.9326                                           | 11.80                                 | 2.20                                   | 5.36                                    | 1.89                             | 1.18                      | 77.4                       |
| 938         | 18          | M        | 22,109                                     | 9.11                                 | 0.9655                                           | 14.33                                 | 4.00                                   | 3.58                                    | 0.85                             | 0.49                      | 57.0                       |
| 990         | 31          | M        | 18,125                                     | 9.45                                 | 0.9775                                           | 12.60                                 | 3.00                                   | 4.20                                    | 1.09                             | 0.55                      | 75.0                       |
| 922         | 26          | M        | 42,240                                     | 9.72                                 | 0.9589                                           | 21.90                                 | 2.10                                   | 10.43                                   | 1.80                             | 0.95                      | 74.5                       |
| 956         | 20          | M        | 48,000                                     | 10.08                                | 0.9489                                           | 10.88                                 | 2.01                                   | 5.42                                    | 1.11                             | 0.69                      | 84.8                       |

Discordant samples are shown in bold.

**Appendix 2: Protocols, PCR/nested PCR primer sequences, and LDR probe sequences used to genotype *P. falciparum* isolates obtained in Pursat in 2010.**

| Assay No. | Outer PCR primer sequences (5'-3') | Inner PCR primer sequences (5'-3') | SNP | Upstream allele-specific probe sequence                   | Downstream conserved probe sequences (with 5' phosphorylation and 3' biotinylation) |
|-----------|------------------------------------|------------------------------------|-----|-----------------------------------------------------------|-------------------------------------------------------------------------------------|
| 3         | TGGAAATACACAATTCAATG               | TTCCAAAATATGTTTGTCTGCT             | C   | cacttaattcattctaaatctatcTTTCAAATGTTATTTTCAACTATGTAAAGTAAC | GATGCAAATAATCTTGATAAAGTATATGG                                                       |
|           | CGAATGTTTTTCCATATTTT               | TGCAGTGGTACTTGTGCTACC              | T   | tactactctataactcactaaaTTTCAAATGTTATTTTCAACTATGTAAAGTAAT   |                                                                                     |
| 4         | CCAACCAACGAACACAAATAC              | AGGAAAATGCTCCGGTAACT               | T   | actacttattctcaactctaataGAAAAAATAAATTTGAACAATAAACTTATAATAA | CATGAACGAGTCACCAATAATATG                                                            |
|           | TGGTTGACTGTTATTGGGGTA              | GGTTCATATTATTGGTGACTCG             | C   | acttattctcactactatataGAAAAAATAATTTGAACAATAAACTTATAAATAG   |                                                                                     |
| 7         | TGAATGTAATATAAATCAGGTTG            | CTGAAAAATCGGATGAATGG               | G   | cactacacattatcatacaaatAAGGAGATAGTGTGGGGGGC                | ATTGCTACATGCATTATACAAAATCC                                                          |
|           | GGCTGGAATAGATAAAAATCA              | GGCTAGCTCAGCTTCCAAT                | A   | aactttctctctattcttattAAGGAGATAGTGTGGGGGGT                 |                                                                                     |
| 8         | CGAATTTAAGTACCTTAGGAAA             | TCACAACGTCCATATGTTGAA              | G   | tcatactttcttactttacattTGATGAAAGCCACCGAACTC                | ATATTTATGGATGAACATTATTAATAAAGATAT                                                   |
|           | TCATAAAGTTTTTATTGTCTTCA            | TCATTATCACCTACTTTCTGTACCA          | A   | tacacaattatcataactaacTGATGAAAGCCACCGAACTT                 |                                                                                     |
| 9         | GAGGATGTATACCATTAGCTG              | GATGAGTTAGCAACGAAACCA              | T   | cataatcaatttcaacttctactCCATCATATAAAATTTCTATATTCCATTAGCT   | AAATTCCTTAGGAAGCTTTTTTCCAAG                                                         |
|           | ATCATTCATATGTGGAACA                | AACGTAACCCAGGAGTAAGACG             | A   | caaatcataatettacattcaactCCATCATATAAAATTTCTATATTCCATTAGCA  |                                                                                     |
| 12        | ATACACTAAACGCAAAAACCT              | CATTATGCGAATGCGGATCTA              | G   | ctttctacatttcaactaattAATGGAAAAATTTTGATGATATTTTATTAAG      | TGAAAATGAAAAAGAATTATCTTCATATAAT                                                     |
|           | TGTTAATTCCTTTTCGATT                | CGTTTATATTGCAACATTTCTTCA           | A   | tcaactctcaattcttactaatAATGGAAAAATTTTGATGATATTTTATTAAG     |                                                                                     |
| 13        | TGACAAACAAGTATATAATAAAGAG          | TGTTGTTGGTGAATACAATGAAA            | G   | cttaacatttaactctataaacAAATAACAATGAACATCATCATGATG          | GTTTCAGTTATTCCAATAATTTTGTGAATAA                                                     |
|           | TGTTTTAAAAGTCGTGGATA               | TCGTACCACCATTAACATTTTG             | A   | tacaacatctcattaacatatacaAAATAACAATGAACATCATCATGATA        |                                                                                     |
| 15        | CATAAATAAAACTTTCCGCTGA             | TGGAATGATTTGAGCAATAGAA             | C   | ttaacaactctactattcaatcaacAAATTCAAATTATGTTTCACAGGAATAAAC   | AAAATGATAAGCTTTTTTCGTGATGA                                                          |
|           | ATTTTCAATATCATCTTCTTTACA           | AATACCCATGATATCACATTCCA            | A   | tetctttaaacaactcaacaataAAATTCAAATTATGTTTCACAGGAATAAAA     |                                                                                     |
| 16        | ATCATCTGTATTTTGTATTATGA            | AATCTTTTCCAGTTATTTTCTATCCA         | C   | aatcaacacacaataaacttataACCTTCCATATCTAAAAAACTTCATT         | AAAATCATAGACAAAAAACAAGTTTC                                                          |
|           | GTTAGACAATTTTGTACACTT              | CATGGGGGTATGTAATTTGG               | A   | caatttcaatttcaacttcttaccACCTTCCATATCTAAAAAACTTCATTA       |                                                                                     |
| 19        | TCACAAACAAATAACAATGAA              | AAAAGCAATTCACAAGAACC               | A   | ttctcattaactctaatcttaccCCTACATTAATGAAAATGAAAACGTTA        | CTCCCAAACCATCTGAAGGT                                                                |
|           | ACATGTTTTGGACCATCTAC               | CTGGTGTTCCTTTTTATTGG               | C   | ttaacaacttatacaacaacaacCCTACATTAATGAAAATGAAAACGTTA        |                                                                                     |
| 20        | AATATATCTGTATTTGCTAACATGA          | TGTGTTTTATTTTAGTGTGAGCTTT          | C   | cataatcaatttcaacttctactCAAAATATCAACAAGAAAAACATAAATACTC    | TTGGATGAAATTTCTTGATGAATATAA                                                         |
|           | TGTAACAAGGAATGACAAAA               | AGAGGATATCCAATAGGGTGCT             | T   | caaatcataatettacattcaactCAAAATATCAACAAGAAAAACATAAATACTT   |                                                                                     |
| 24        | CGATTTAATTACTGTTTGGAGA             | AACAAATCATCAATTAAGTCATCC           | G   | cacttaattcattctaaatctatcAATTAGAAAATACACAAAATTATCAAAAAAG   | AATTGAAAATTTAAAAAATGTTATTGTTTC                                                      |
|           | TTGGTTTACAATTAGTTCTAGC             | TGAGGAATAGGTTTCATATGCTG            | T   | ttacaatctaatcacactatacAATTAGAAAATACACAAAATTATCAAAAAAT     |                                                                                     |

First-round PCRs were performed in the following reaction mixture: 2.5  $\mu$ L 10X buffer, 2.5 mM MgCl<sub>2</sub>, 0.2 mM each deoxynucleoside triphosphate, 0.25  $\mu$ M each primer, 1.25 U FirePol Taq polymerase (Solis Biodyne, Tartu, Estonia), and 5  $\mu$ L DNA template. Nested PCRs were performed in the same reaction mixture with 3  $\mu$ L of first-round PCR products (diluted 1:10) added. PCR amplifications were performed under the following conditions: first-round PCR - 95°C for 15 min and 30 cycles at 95°C for 30 s, 52°C for 30 s, 72°C for 1 min, and a final extension at 72°C for 10 min; nested PCR - 95°C for 15 min and 40 cycles at 95°C for 10 s, 57°C for 15 s, 72°C for 20 s, and a final extension at 72°C for 10 min. As previously described,<sup>1-3</sup> a ligase detection reaction between modified upstream allele-specific (with unique 5' extremity TAG sequences) and downstream conserved sequence primers (with a 5' phosphorylation and 3' biotinylation) were performed using 1  $\mu$ L of nested PCR products in 15  $\mu$ L solution of 20 mM Tris-HCl buffer (pH 7.6), 25 mM potassium acetate, 10 mM magnesium acetate, 1 mM NAD<sup>+</sup>, 10 mM dithiothreitol, 0.1% Triton X-100, 10 nM each LDR probe, and 2 U of Taq

DNA ligase (New England Biolabs, Beverly, MA, USA). Reaction mixtures were heated to 95°C for 1 min, followed by 32 cycles at 95°C for 15 s and 60°C for 2 min. In a second step, 5 µL of multiplex LDR products were added to 60 µL of hybridization solution (3 M tetramethylammonium chloride [TMAC], 50 mM Tris-HCl [pH 8.0], 3 mM EDTA [pH 8.0], 0.10% sodium dodecyl sulfate) containing 2500 MagPlex-TAG Microspheres® (Luminex, Austin, TX, USA) for each allelic set, heated to 95°C for 90 s and incubated at 37°C for 40 min to allow hybridization between SNP-specific LDR products and microsphere-labelled anti-TAG probes. Following hybridization, 6 µL of streptavidin-R-phycoerythrin (Molecular Probes, Eugene, OR, USA) in TMAC hybridization solution (20 ng/µL) was added and incubated at 37°C for 40 min in Costar 6511 M polycarbonate 96-well V-bottom plates (Corning Inc., Corning, NY, USA). Detection of SNP-specific products was performed through a MagPix machine (Luminex). Fluorescence data were managed by xPONENT software (Luminex) and entered into Microsoft Excel software (Microsoft Office 2010). In each run, samples were analyzed with 3D7, Dd2, and HB3 genomic DNA controls and no template control.

1. Barnadas C, Kent D, Timinao L, et al. A new high-throughput method for simultaneous detection of drug resistance associated mutations in *Plasmodium vivax dhfr*, *dhps* and *mdr-1* genes. *Malar J* 2011;**10**:282.
2. Carnevale EP, Kouri D, DaRe JT, McNamara DT, Mueller I, Zimmerman PA. A multiplex ligase detection reaction-fluorescent microsphere assay for simultaneous detection of single nucleotide polymorphisms associated with *Plasmodium falciparum* drug resistance. *J Clin Microbiol* 2007;**45**:752-61.
3. McNamara DT, Thomson JM, Kasehagen LJ, Zimmerman PA. Development of a multiplex PCR-ligase detection reaction assay for diagnosis of infection by the four parasite species causing malaria in humans. *J Clin Microbiol* 2004;**42**:2403-10.

**Appendix 3: Patient information and corresponding data from ex-vivo assays performed on *P. falciparum* isolates from Pursat, Preah Vihear, and Ratanakiri in 2012.**

| ID          | Site         | Age (year) | Sex | Parasitemia at 0 hours (/mm <sup>3</sup> ) | Parasite clearance half-life (hours) | Fit of parasite clearance curve - R <sup>2</sup> | Ex-vivo RSA value (%) |                 |                   |
|-------------|--------------|------------|-----|--------------------------------------------|--------------------------------------|--------------------------------------------------|-----------------------|-----------------|-------------------|
|             |              |            |     |                                            |                                      |                                                  | tri-gas               | candle-jar      | 5%CO <sub>2</sub> |
| 163-KH1-005 | Pursat       | 26         | M   | 39,412                                     | 7.97                                 | 0.9628                                           | 20.95                 | 11.05           | 22.83             |
| 163-KH1-006 | Pursat       | 18         | M   | 74,847                                     | 4.32                                 | 0.9899                                           | 18.55                 | 22.40           | 19.05             |
| 163-KH1-007 | Pursat       | 17         | M   | 22,638                                     | 5.76                                 | 0.9883                                           | 42.51                 | 39.06           | 22.23             |
| 163-KH1-013 | Pursat       | 45         | M   | 25,374                                     | 7.87                                 | 0.9734                                           | 29.54                 | 38.25           | 24.17             |
| 163-KH1-015 | Pursat       | 23         | M   | 24,434                                     | 4.37                                 | 0.9850                                           | 12.83                 | 14.85           | 17.94             |
| 163-KH1-016 | Pursat       | 31         | M   | 55,58                                      | 4.33                                 | 0.9860                                           | 0.54                  | 1.12            | 0.31              |
| 163-KH1-018 | Pursat       | 29         | M   | 77,333                                     | 6.42                                 | 0.9687                                           | 54.48                 | 49.01           | 51.16             |
| 163-KH1-021 | Pursat       | 23         | M   | 42,061                                     | 3.00                                 | 0.9905                                           | 0.12                  | 0.01            | 0.14              |
| 163-KH1-022 | Pursat       | 58         | F   | 10,892                                     | 7.35                                 | 0.9862                                           | 24.18                 | 16.29           | 14.09             |
| 163-KH1-027 | Pursat       | 18         | M   | 15,669                                     | 4.09                                 | 0.9415                                           | 0.19                  | 0.06            | 0.40              |
| 163-KH1-030 | Pursat       | 17         | F   | 102,222                                    | 1.49                                 | 0.9871                                           | 0.20                  | 0.06            | 0.04              |
| 163-KH1-031 | Pursat       | 16         | F   | 108,102                                    | 8.46                                 | 0.9712                                           | 35.03                 | 27.89           | 23.35             |
| 163-KH2-005 | Preah Vihear | 31         | M   | 142,857                                    | 2.73                                 | 0.9665                                           | 0.91                  | 0.20            | 0.71              |
| 163-KH2-009 | Preah Vihear | 45         | F   | 128                                        | 2.23                                 | 0.9909                                           | 1.50                  | 0.47            | ND <sup>1</sup>   |
| 163-KH2-010 | Preah Vihear | 31         | M   | 86,792                                     | 8.16                                 | 0.9809                                           | 12.23                 | NI <sup>2</sup> | 11.98             |
| 163-KH2-016 | Preah Vihear | 59         | M   | 73,379                                     | 1.98                                 | 0.9172                                           | 0.50                  | 0.45            | 0.18              |
| 163-KH2-020 | Preah Vihear | 24         | F   | 41,859                                     | 2.33                                 | 0.9726                                           | 0.11                  | 0.40            | 0.26              |
| 163-KH2-023 | Preah Vihear | 40         | F   | 42,772                                     | 1.61                                 | 0.9917                                           | 0.20                  | 0.25            | 0.13              |
| 163-KH2-024 | Preah Vihear | 35         | F   | 16,236                                     | 5.87                                 | 0.9405                                           | 3.47                  | 1.39            | 2.60              |
| 163-KH3-002 | Ratanakiri   | 25         | M   | 21,587                                     | 1.88                                 | 0.9862                                           | 0.28                  | ND              | ND                |
| 163-KH3-004 | Ratanakiri   | 19         | M   | 87,23                                      | 2.23                                 | 0.9887                                           | 1.86                  | ND              | ND                |
| 163-KH3-005 | Ratanakiri   | 13         | F   | 31,17                                      | 2.73                                 | 0.9627                                           | 0.38                  | 0.47            | 0.78              |
| 163-KH3-008 | Ratanakiri   | 32         | M   | 10,614                                     | 9.06                                 | 0.9279                                           | 38.59                 | 54.51           | 36.82             |
| 163-KH3-010 | Ratanakiri   | 50         | M   | 53,64                                      | 1.36                                 | 0.9693                                           | 0.14                  | 0.30            | 0.01              |
| 163-KH3-012 | Ratanakiri   | 14         | F   | 12,504                                     | 2.83                                 | 0.9683                                           | 0.40                  | 0.10            | 0.25              |
| 163-KH3-018 | Ratanakiri   | 19         | F   | 31,883                                     | 2.34                                 | 0.9209                                           | 1.98                  | 1.33            | 1.93              |
| 163-KH3-019 | Ratanakiri   | 14         | F   | 37,487                                     | 1.89                                 | 0.9935                                           | 0.20                  | 0.25            | 0.23              |
| 163-KH3-022 | Ratanakiri   | 18         | M   | 30,189                                     | 2.61                                 | 0.9904                                           | 0.41                  | 0.77            | 0.70              |
| 163-KH3-023 | Ratanakiri   | 34         | M   | 56,901                                     | 2.10                                 | 0.9663                                           | 1.09                  | 0.74            | 1.08              |
| 163-KH3-025 | Ratanakiri   | 11         | F   | 49,582                                     | 2.32                                 | 0.9669                                           | 1.35                  | 0.10            | 0.35              |

<sup>1</sup>Not done

<sup>2</sup>Not interpretable

KH1, KH2, and KH3 are identifying codes for Pursat, Preah Vihear, and Ratanakiri, respectively; these codes are *not* related to the parasite subpopulations reported by Miotto et al. (*Nat Genet*, 2013).

**Appendix 4: Grading of asexual *P. falciparum* parasites into two developmental categories: ‘tiny’ (Panel A) and ‘large’ (Panel B) rings.**

**Panel A**

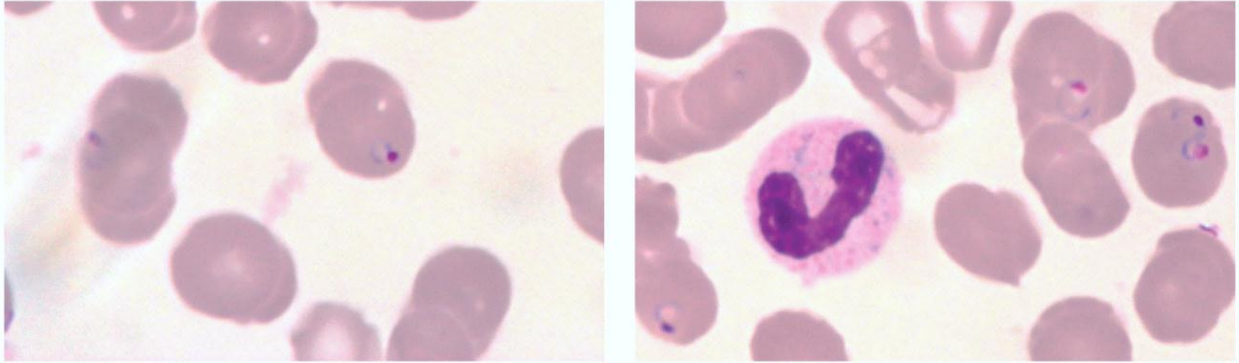

**Panel B**

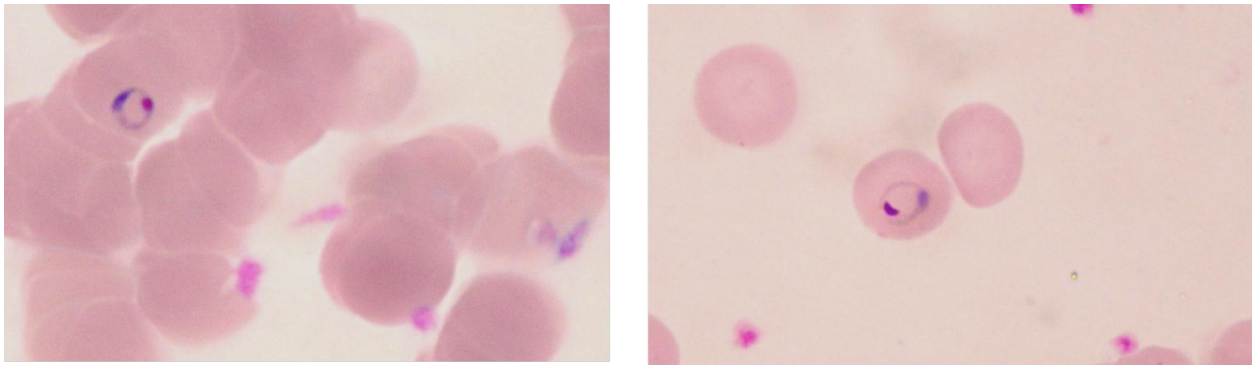

Representative photomicrographs of *P. falciparum* isolates collected from patients just prior to receiving a first dose of artesunate. Giemsa-stained thin blood films are shown. Rings were classified as ‘tiny rings’ when the width of the cytoplasm band was less than, or equal to, half of the diameter of the nucleus (Panel A) and as ‘large rings’ when the width of the cytoplasm band was greater than the diameter of the nucleus (Panel B).

**Appendix 5: Selection of *P. falciparum* isolates from Pursat 2010 for culture adaptation and use in in-vitro assays.**

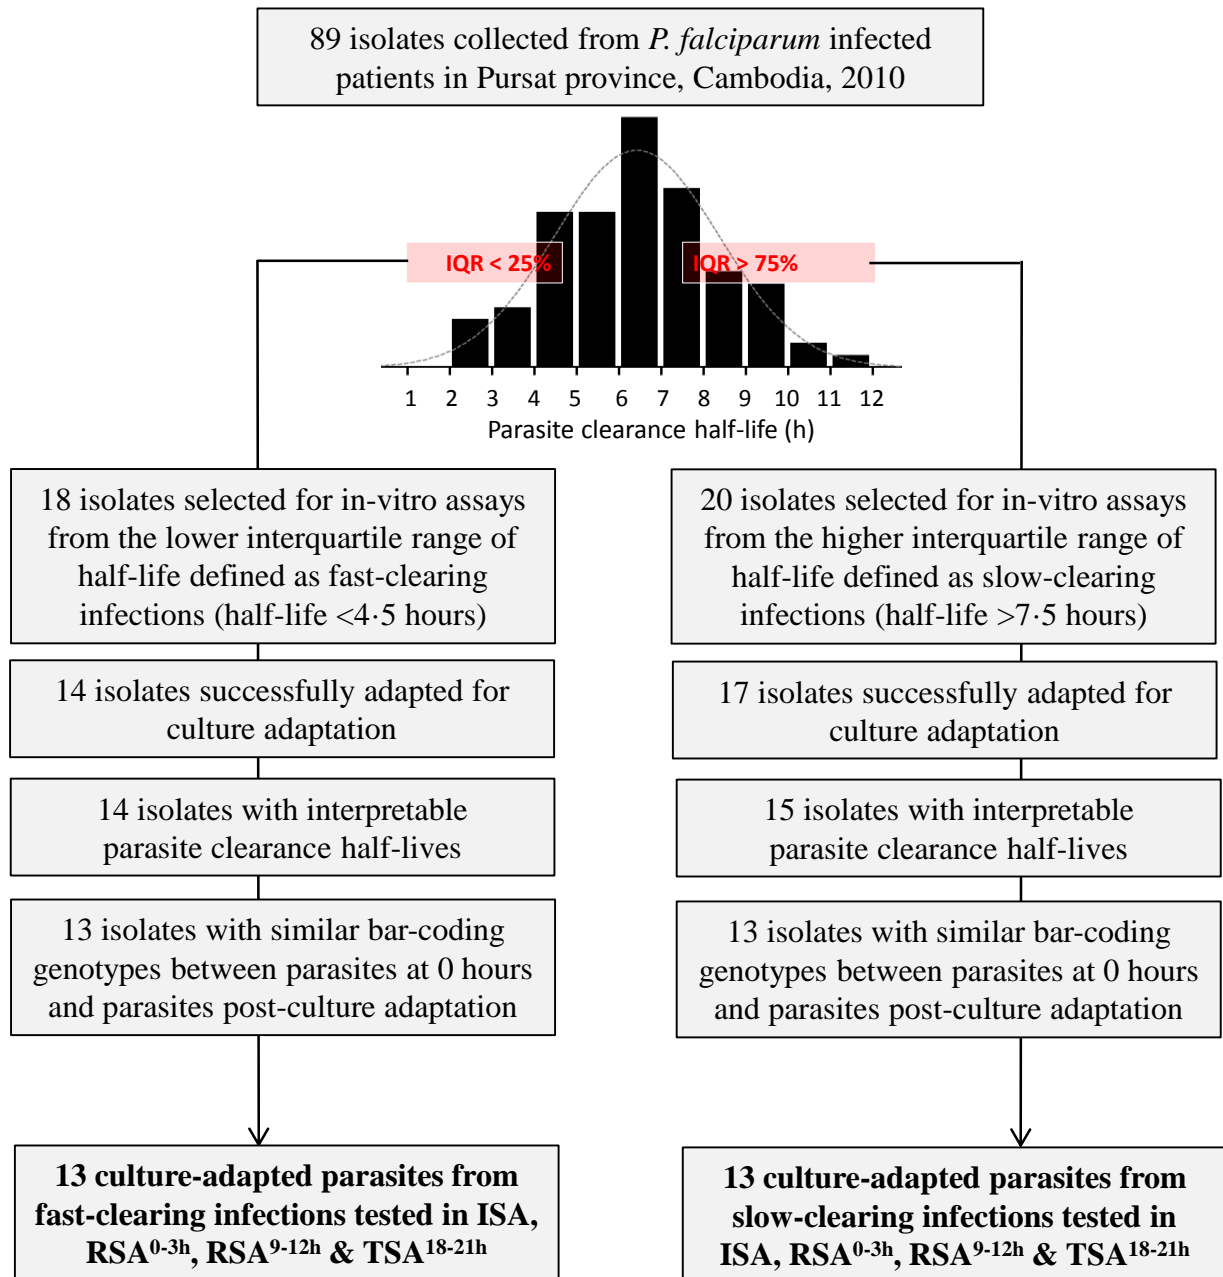

ISA: Isotope-based assay; RSA<sup>0-3h</sup>: Ring-stage survival assay with 0-3 hour rings; RSA<sup>9-12h</sup>: Ring-stage survival assay with 9-12 hour rings & TSA<sup>18-21h</sup>: Trophozoite-stage survival assay with 18-21 hour trophozoites.



**Appendix 6: Individual stage-dependent patterns in in-vitro survival assays (RSA<sup>0-3h</sup>, RSA<sup>9-12h</sup>, and TSA<sup>18-21h</sup>) performed on parasite isolates from fast- (Panel A) and slow-clearing (Panel B) infections in Pursat in 2010.**

**Panel A**

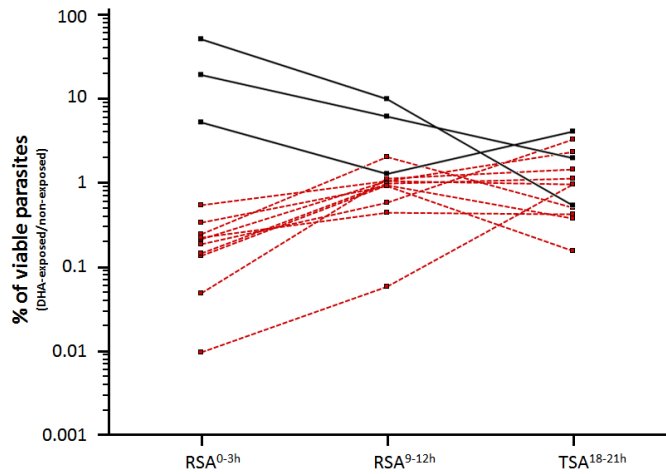

The dotted red lines represent the stage-dependent survival patterns of parasites that show 'concordance' between half-lives and RSA<sup>0-3h</sup> survival rates ( $\Delta = -0.7\%$ ) and the black solid lines represent the stage-dependent survival patterns of parasites that show 'discordance' between half-lives and RSA<sup>0-3h</sup> survival rates ( $\Delta = 17.3\%$ ,  $P=0.01$ , Mann-Whitney  $U$  test).

**Panel B**

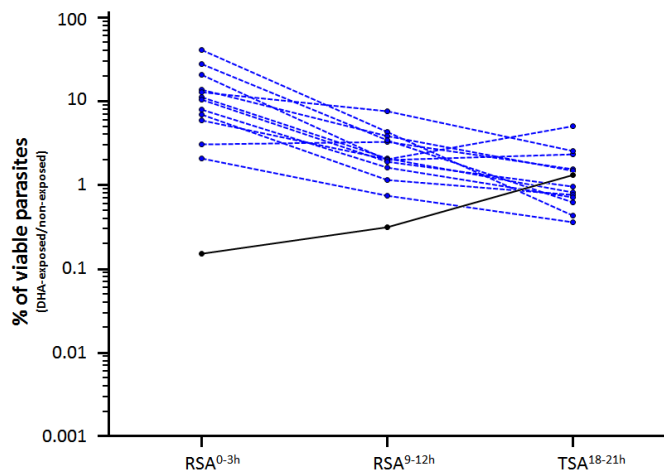

The dotted blue lines represent the stage-dependent survival patterns of parasites that show 'concordance' between half-lives and RSA<sup>0-3h</sup> survival rates ( $\Delta = 10.3\%$ ) and the black solid line shows the stage-dependent survival pattern of the parasite that showed 'discordance' between the half-life and RSA<sup>0-3h</sup> survival rate ( $\Delta = -1.2\%$ ).
